# Supplementary material
Source: publisher site journal article supplement (https://italianbotanist.pensoft.net/article/30575/download/suppl/31/)
Supplement: Supplementary file 1

**Supplementary data (Edited by F. Bartolucci, G. Galasso)**

Categories concerning the occurrence status of taxa follow Bartolucci et al. (2018).

1. Nomenclature updates

| **Family** | **Nomenclature according to Bartolucci et al. (2018)** | **Revised nomenclature** | **References/Note** |
| --- | --- | --- | --- |
| **Ranunculaceae** | *Adonis flammea* Jacq. subsp. *cortiana* (Jacq.) C.H.Steinb. | *Adonis flammea* Jacq. subsp. *cortiana* C.H.Steinb. | The authorship of the name is corrected according to the protologue |
| **Pteridaceae** | *Allosorus acrosticus* (Balb.) Christenh. | *Oeosporangium acrosticum* (Balb.) L.Sáez & Aymerich | Sáez and Aymerich (2017) |
| **Pteridaceae** | *Allosorus guanchicus* (Bolle) Christenh. | *Oeosporangium guanchicum* (Bolle) Fraser-Jenk. & Pariyar | Fraser-Jenkins et al. (2016) |
| **Pteridaceae** | *Allosorus persicus* (Bory) Christenh. | *Oeosporangium persicum* (Bory) Vis. | Fraser-Jenkins et al. (2016) |
| **Pteridaceae** | *Allosorus pteridioides* (Reichard) Christenh. | *Oeosporangium pteridioides* (Reichard) Fraser-Jenk. & Pariyar | Fraser-Jenkins et al. (2016) |
| **Pteridaceae** | *Allosorus tinaei* (Tod.) Christenh. | *Oeosporangium tinaei* (Tod.) Fraser-Jenk. | Fraser-Jenkins et al. (2016) |
| **Primulaceae** | *Androsace multiflora* (Vand.) Moretti | *Androsace multiflora* (Vand.) Moretti, non Lam., *nom. illeg.* | Dentant et al. 2018; synonym of *Androsace argentea* (C.F.Gaertn.) Lapeyr. |
| **Primulaceae** | *Androsace vandellii* (Turra) Chiov. | *Androsace argentea* (C.F.Gaertn.) Lapeyr. | Dentant et al. (2018); the name *Androsace vandellii* (Turra) Chiov. is correctly cited as *Androsace vandeli* Chiov. (Art. 60.9 of the ICN) |
| **Fabaceae** | *Anthyllis jacquinii* A.Kern. | *Anthyllis jacquini* (Rchb.f.) A.Kern. | Gutermann and Kropf (2009); synonym of *Anthyllis montana* L. subsp. *jacquinii* (Rchb.f.) Rohlena |
| **Fabaceae** | *Anthyllis montana* L. subsp. *jacquinii* (A.Kern.) Hayek | *Anthyllis montana* L. subsp. *jacquinii* (Rchb.f.) Rohlena | Gutermann and Kropf (2009); the name *Anthyllis montana* L. subsp. *jacquinii* (Rchb.f.) Hayek is a later isonym of *Anthyllis montana* L. subsp. *jacquinii* (Rchb.f.) Rohlena |
| **Fabaceae** | *Anthyllis vulneraria* L. subsp. *baldensis* (A.Kern. ex Sagorski) Pignatti ex Kerguélen | *Anthyllis vulneraria* L. subsp. *baldensis* (Sagorski) Pignatti ex Kerguélen | The authorship of the name is corrected according to Art. 46 of the ICN (Turland et al. 2018) |
| **Primulaceae** | *Aretia vandellii* Turra | *Aretia vandeli* Turra, *nom. illeg.* | The name *Aretia vandellii* Turra is illegitimate under Art.52.3 of the ICN (Turland et al. 2018); synonym of *Androsace argentea* (C.F.Gaertn.) Lapeyr. (Dentant et al. 2018) |
| **Fabaceae** | *Astragalus raphaelis* Ferro | *Astragalus raphaelis* G.Ferro | Misprint in Bartolucci et al. (2018) |
| **Chenopodiaceae** | *Atriplex tornabenei* Tineo subsp. *tornabenei* | *Atriplex tornabenei* Tineo ex Guss. subsp. *tornabenei* | The authorship of the name is corrected according to Art. 46 of the ICN (Turland et al. 2018) |
| **Chenopodiaceae** | *Atriplex tatarica* L. subsp. *tornabenei* (Tineo) C.Blanché & al. | *Atriplex tatarica* L. subsp. *tornabenei* (Tineo ex Guss.) C.Blanché, Molero & Rovira | The authorship of the name is corrected according to Art. 46 of the ICN (Turland et al. 2018); synonym of *Atriplex tornabenei* Tineo ex Guss. subsp. *tornabenei* |
| **Brassicaceae** | *Aubrieta columnae* Guss. subsp. *sicula* (Steven) Phitos | *Aubrieta columnae* Guss. subsp. *sicula* (Strobl) M.A.Koch, D.A.German & R.Karl | Misprint in Bartolucci et al. (2018) |
| **Poaceae** | *Avena parlatorei* Woods | *Avena parlatorei* J.Woods | Misprint in Bartolucci et al. (2018); basionym of *Helictotrichon parlatorei* (J.Woods) Pilg. |
| **Poaceae** | *Avenastrum parlatorei* (Woods) Beck | *Avenastrum parlatorei* (J.Woods) Beck | Misprint in Bartolucci et al. (2018); synonym of *Helictotrichon parlatorei* (J.Woods) Pilg. |
| **Lamiaceae** | *Ballota hispanica* (L.) Benth. | *Pseudodictamnus hispanicus* (L.) Salmaki & Siadati | Siadati et al. (2018) |
| **Lamiaceae** | *Ballota nigra* L. subsp. *uncinata* Fiori & Bég. | *Ballota nigra* L. var. *meridionalis* Bég. f. *uncinata* Bég. | The name is corrected according to the protologue; basionym of *Ballota nigra* L. subsp. *uncinata* (Bég.) Patzak |
| **Lamiaceae** | *Ballota nigra* L. subsp. *uncinata* (Fiori & Bég.) Patzak | *Ballota nigra* L. subsp. *uncinata* (Bég.) Patzak | The authorship of the name is corrected according to the protologue |
| **Poaceae** | *Bothriochloa insculpta* (A.Rich.) A.Camus subsp. *panormitana* (Parl.) Giardina & Raimondo | *Bothriochloa insculpta* (Hochst. ex A.Rich.) A.Camus subsp. *panormitana* (Parl.) Giardina & Raimondo | The authorship of the name is corrected according to Art. 46 of the ICN (Turland et al. 2018) |
| **Poaceae** | *Brachypodium glaucovirens* (Murb.) T.Durand & B.D.Jacks. | *Brachypodium glaucovirens* (Murb.) Sagorski | *Brachypodium glaucovirens* (Murb.) T.Durand & B.D.Jacks. is an invalid name. |
| **Poaceae** | *Brachypodium sylvaticum* (Huds.) P.Beauv. | *Brachypodium sylvaticum* (Huds.) P.Beauv. subsp. *sylvaticum* | At least another accepted subspecies exists |
| **Apiaceae** | *Bupleurum cernuum* Ten. | *Bupleurum cernuum* Ten., *nom. illeg.* | Synonym of *Bupleurum falcatum* L. subsp. *cernuum* (Nyman) Arcang. |
| **Apiaceae** | *Bupleurum falcatum* L. subsp. *cernuum* (Ten.) Arcang. | *Bupleurum falcatum* L. subsp. *cernuum* (Nyman) Arcang. |  |
| **Apiaceae** | *Bupleurum gramineum* Vill. subsp. *cernuum* (Ten.) Nyman | *Bupleurum gramineum* Vill. subsp. *cernuum* Nyman | Basionym of *Bupleurum falcatum* L. subsp. *cernuum* (Nyman) Arcang. |
| **Alismataceae** | *Caldesia parnassifolia* (Bassi ex L.) Parl. | *Caldesia parnassifolia* (Bassi) Parl. | Gennai et al. (2012) |
| **Brassicaceae** | *Camelina microcarpa* Andrz. ex DC. | *Camelina sativa* (L.) Crantz subsp. *microcarpa* (Andrz. ex DC.) Bonnier | Single wild starting taxon of *C. sativa* (L.) Crantz sub. *sativa* (Zohary and Hopf 2000, Brock et al. 2018) |
| **Cyperaceae** | *Carex hartmanii* Cajander | *Carex hartmaniorum* A.Cajander | Koopman (2018) |
| **Cyperaceae** | *Carex intricata* Tineo | *Carex intricata* Tineo ex Guss. | The authorship of the name is corrected according to Art. 46 of the ICN (Turland et al. 2018); basionym of *Carex nigra* (L.) Reichard subsp*. intricata* (Tineo ex Guss.) Rivas Mart. |
| **Cyperaceae** | *Carex laxula* Tin. ex Boott | *Carex paui* Sennen | Troia et al. (2018); *Carex laxula* Tin. ex Boott, *nom. inval.* (Art. 36.1 of the ICN, Turland et al. 2018) |
| **Cyperaceae** | *Carex nigra* (L.) Reichard subsp*. intricata* (Tineo) Rivas Mart. | *Carex nigra* (L.) Reichard subsp*. intricata* (Tineo ex Guss.) Rivas Mart. | The authorship of the name is corrected according to Art. 46 of the ICN (Turland et al. 2018) |
| **Cyperaceae** | *Carex sylvatica* Huds. subsp. *paui* (Sennen) A.Bolòs & O.Bolòs | *Carex sylvatica* Huds. subsp. *paui* (Sennen) A.Bolòs & O.Bolòs, *isonym* | Troia et al. (2018); synonym of *Carex paui* Sennen |
| **Asteraceae** | *Centaurea flosculosa* Willd. | *Centaurea flosculosa* Balb. ex Willd. | The authorship of the name is corrected according to Art. 46 of the ICN (Turland et al. 2018) |
| **Asteraceae** | *Centaurea scabiosa* L. subsp. *grinensis* (Reut.) Hayek | *Centaurea scabiosa* L. subsp. *grinensis* (Reut.) Nyman | Misprint in Bartolucci et al. (2018) |
| **Chenopodiaceae** | *Chenopodium album* L. subsp. *pedunculare* (Bertol.) Arcang. | *Chenopodium pedunculare* Bertol. | Iamonico and Mosyakin (2018) |
| **Saxifragaceae** | *Chrysosplenium dubium* Gay ex Ser. | *Chrysosplenium dubium* J.Gay ex Ser. | Misprint in Bartolucci et al. (2018) |
| **Lamiaceae** | *Clinopodium alpinum* (L.) Merino subsp. *alpinum* | *Clinopodium alpinum* (L.) Kuntze subsp. *alpinum* | Misprint in Bartolucci et al. (2018) |
| **Lamiaceae** | *Clinopodium alpinum* (L.) Merino subsp. *meridionale* (Nyman) Govaerts | *Clinopodium alpinum* (L.) Kuntze subsp. *meridionale* (Nyman) Govaerts | Misprint in Bartolucci et al. (2018) |
| **Lamiaceae** | *Clinopodium alpinum* (L.) Merino subsp. *nebrodense* (A.Kern. & Strobl) Bartolucci & F.Conti | *Clinopodium alpinum* (L.) Kuntze subsp. *nebrodense* (A.Kern. & Strobl) Bartolucci & F.Conti | Misprint in Bartolucci et al. (2018) |
| **Poaceae** | *Danthonia calycina* (Lam.) Rchb. | *Danthonia calycina* (Vill.) Rchb. | The authorship of the name is corrected according to the protologue; synonym of *Danthonia alpina* Vest |
| **Poaceae** | *Elymus asper* (Simonk.) Hand.-Mazz. | *Elymus asper* (Simonk.) Hand.-Mazz. ex Wettst., non Nees ex Steud., *isonym* | Synonym of *Taeniatherum asperum* (Simonk.) Nevski |
| **Euphorbiaceae** | *Euphorbia valliniana* Belli | *Euphorbia vallinoana* Belli | The termination of the specific epithet, derived from Filippo Vallino, is corrected according to Arts. 60.8-9 of the ICN (Turland et al. 2018) |
| **Orobanchaceae** | *Euphrasia marchesettii* Wettst. ex Marches. | *Euphrasia marchesettii* Wettst. | The authorship of the name is corrected according to Art. 46 of the ICN (Turland et al. 2018) |
| **Poaceae** | *Festuca divaricata* Desf. | *Cutandia divaricata* (Desf.) Barbey | Soreng et al. (2017) |
| **Poaceae** | *Festuca lanceolata* Forssk. | *Cutandia maritima* (L.) Benth. ex Barbey | Soreng et al. (2017) |
| **Papaveraceae** | *Fumaria bicolor* Nicotra | *Fumaria bicolor* Sommier | The authorship of the name is corrected according to the protologue |
| **Poaceae** | *Helictotrichon parlatorei* (Woods) Pilg. | *Helictotrichon parlatorei* (J.Woods) Pilg. | Misprint in Bartolucci et al. (2018) |
| **Caryophyllaceae** | *Herniaria glabra* L. subsp. *nebrodensis* Jan ex Nyman | *Herniaria glabra* L. subsp. *nebrodensis* Nyman | The authorship of the name is corrected according to Art. 46 of the ICN (Turland et al. 2018) |
| **Caryophyllaceae** | *Herniaria permixta* Guss. | *Herniaria permixta* Jan ex Guss. | The authorship of the name is corrected according to Art. 46 of the ICN (Turland et al. 2018) |
| **Asteraceae** | *Hieracium stenoplecum* Arv.-Touv. & Huter subsp. *stenoplecum* | *Hieracium entleutneri* Zahn ex Gottschl. | Gottschlich (2017) |
| **Brassicaceae** | *Hugueninia tanacetifolia* (L.) Rchb. subsp. *tanacetifolia* | *Descurainia tanacetifolia* (L.) Prantl | Al-Shehbaz (2012) |
| **Isoëtaceae** | *Isoëtes sabatina* Troìa & Azella | *Isoëtes sabatina* Troìa & Azzella | Misprint in Bartolucci et al. (2018) |
| **Asteraceae** | *Jacea flosculosa* (Willd.) Holub | *Jacea flosculosa* (Balb. ex Willd.) Holub | The authorship of the name is corrected according to Art. 46 of the ICN (Turland et al. 2018); synonym of *Centaurea flosculosa* Balb. ex Willd. |
| **Juncaceae** | *Juncus sorrentinii* Parl. | *Juncus sorrentinoi* Parl. | The termination of the specific epithet, derived from Duca di Sorrentino, is corrected according to Arts. 60.8-9 of the ICN (Turland et al. 2018) |
| **Lamiaceae** | *Lamium garganicum* L. subsp. *laevigatum* Arcang. | *Lamium garganicum* L. subsp. *longiflorum* (Ten.) Kerguélen | The name *L.* *garganicum* L. subsp. *laevigatum* Arcang., correctly cited as *L.* *garganicum* L. subsp. *laevigatum* (L.) Arcang., is synonym of *L. maculatum* L. |
| **Fabaceae** | *Lathyrus gorgoni* Parl. | *Lathyrus gorgonei* Parl. | The termination of the specific epithet, derived from Giovanni Gorgone, is corrected according to Arts. 60.8-9 of the ICN (Turland et al. 2018) |
| **Asteraceae** | *Leontodon intermedius* (Fiori) Huter, Porta & Rigo ex Rigo | *Leontodon intermedius* (Fiori) Huter, Porta & Rigo | Galasso et al. (2018); the authorship of the name is corrected according to Art. 46 of the ICN (Turland et al. 2018) |
| **Asteraceae** | *Leucanthemum pachyphyllum* Marchi & Illuminati | *Leucanthemum pachyphyllum* Marchi & Illum. | Misprint in Bartolucci et al. (2018) |
| **Caprifoliaceae** | *Lonicera stabiana* Guss. ex Pasq. | *Lonicera stabiana* Guss. & Pasq. | Misprint in Bartolucci et al. (2018), see Peruzzi et al. (2015) |
| **Brassicaceae** | *Matthiola incana* (L.) R.Br. var. *pulchella* Conti | *Matthiola incana* (L.) W.T.Aiton var. *pulchella* Conti | Misprint in Bartolucci et al. (2018); synonym of *Matthiola* *incana* (L.) W.T.Aiton subsp. *pulchella* (Conti) Greuter & Burdet |
| **Fabaceae** | *Medicago littoralis* Loisel. | *Medicago littoralis* Rohde ex Loisel. | The authorship of the name is corrected according to Art. 46 of the ICN (Turland et al. 2018) |
| **Fabaceae** | *Medicago tenoreana* DC. | *Medicago tenoreana* Ser. | The authorship of the name is corrected according to the protologue |
| **Poaceae** | *Milium montianum* (Parl.) K.Richt. | *Milium vernale* M.Bieb. subsp*. montianum* (Parl.) K.Richt. | The basionym is correctly cited as *Milium montianum* Parl. |
| **Caryophyllaceae** | *Moehringia sedoides* (Pers.) Loisel. | *Moehringia sedoides* (Pers.) Ugo Cumino ex Loisel. | The authorship of the name is corrected according to Art. 46 of the ICN (Turland et al. 2018) |
| **Lamiaceae** | *Nepeta apuleii* Ucria | *Nepeta apulejii* Ucria | The spelling of the specific epithet is corrected according to Art. 60.6 of the ICN (Turland et al. 2018) |
| **Fabaceae** | *Onobrychis calabrica* Sirjaev | *Onobrychis calabrica* Širj. | Misprint in Bartolucci et al. (2018) |
| **Orchidaceae** | *Ophrys argolica* H.Fleischm. ex Vierh. subsp. *crabronifera* (Sebast. & Mauri) Faurh. | *Ophrys argolica* H.Fleischm. ex Vierh. subsp. *crabronifera* (Mauri) Faurh. | Misprint in Bartolucci et al. (2018); synonym of *Ophrys crabronifera* Mauri |
| **Asparagaceae** | *Ornithogalum montanum* Cirillo ex Ten. | *Ornithogalum montanum* Ten. | The authorship of the name is corrected according to Art. 46 of the ICN (Turland et al. 2018) |
| **Orobanchaceae** | *Orobanche densiflora* Bertol. | *Orobanche densiflora* Salzm. ex Bertol. | The authorship of the name is corrected according to Art. 46 of the ICN (Turland et al. 2018) |
| **Polygonaceae** | *Persicaria dubia* (Stein.) Fourr. | *Persicaria mitis* (Schrank) Assenov | The name *Persicaria mitis* (Schrank) Assenov is conserved against *P. mitis* Delarbre, and has priority over *Persicaria dubia* (Stein.) Fourr. |
| **Apiaceae** | *Pimpinella gussonei* Bertol. | *Pimpinella gussonei* (C.Presl) Bertol. | Misprint in Bartolucci et al. (2018), see Peruzzi et al. (2015) |
| **Lentibulariaceae** | *Pinguicula sehuensis* Bacch., Carras & Peruzzi | *Pinguicula sehuensis* Bacch., Cannas & Peruzzi | Misprint in Bartolucci et al. (2018) |
| **Plantaginaceae** | *Plantago coronopus* L. subsp. *humilis* (Guss.) Gamisans | *Plantago coronopus* L. subsp. *humilis* (Jan ex Guss.) Gamisans | The authorship of the name is corrected according to Art. 46 of the ICN (Turland et al. 2018); synonym of *Plantago humilis* Jan ex Guss. |
| **Plantaginaceae** | *Plantago humilis* Guss. | *Plantago humilis* Jan ex Guss. | The authorship of the name is corrected according to Art. 46 of the ICN (Turland et al. 2018) |
| **Plantaginaceae** | *Plantago macrorhiza* Poir. subsp. *humilis* (Guss.) Pilg. | *Plantago macrorhiza* Poir. subsp. *humilis* (Jan ex Guss.) Pilg. | The authorship of the name is corrected according to Art. 46 of the ICN (Turland et al. 2018); synonym of *Plantago humilis* Jan ex Guss. |
| **Plantaginaceae** | *Plantago sarda* C.Presl | *Plantago subulata* L. | Hassemer (2018) |
| **Poaceae** | *Polypogon viridis* (Gouan) Breistr. | *Polypogon viridis* (Gouan) Breistr. subsp. *viridis* | At least another accepted subspecies exists |
| **Ranunculaceae** | *Ranunculus aspromontanus* Huter | *Ranunculus aspromontanus* Huter, Porta & Rigo | Galasso et al. (2018); the authorship of the name is corrected according to Art. 46 of the ICN (Turland et al. 2018); basionym of *Ranunculus monspeliacus* L. subsp. *aspromontanus* (Huter, Porta & Rigo) Peruzzi & N.G.Passal. |
| **Ranunculaceae** | *Ranunculus monspeliacus* L. subsp. *aspromontanus* (Huter) Peruzzi & N.G.Passal. | *Ranunculus monspeliacus* L. subsp. *aspromontanus* (Huter, Porta & Rigo) Peruzzi & N.G.Passal. | Galasso et al. (2018); the authorship of the name is corrected according to Art. 46 of the ICN (Turland et al. 2018) |
| **Ranunculaceae** | *Ranunculus monspeliacus* L. subsp. *saxatilis* (Balb.) Nyman | *Ranunculus monspeliacus* L. subsp. *saxatilis* Nyman |  |
| **Ranunculaceae** | *Ranunculus saxatilis* Balb. | *Ranunculus saxatilis* Balb., non Vill., *nom. illeg.* | *Ranunculus saxatilis* Balb. is a later homonym of *R.* *saxatilis* Vill.; synonym of *Ranunculus monspeliacus* L. subsp. *saxatilis* Nyman |
| **Ranunculaceae** | *Ranunculus spicatus* Desf. subsp. *aspromontanus* (Huter) Greuter & Burdet | *Ranunculus spicatus* Desf. subsp. *aspromontanus* (Huter, Porta & Rigo) Greuter & Burdet | Galasso et al. (2018); the authorship of the name is corrected according to Art. 46 of the ICN (Turland et al. 2018), synonym of *Ranunculus monspeliacus* L. subsp. *aspromontanus* (Huter, Porta & Rigo) Peruzzi & N.G.Passal. |
| **Orobanchaceae** | *Rhinanthus freynii* (Sterneck) Fiori | *Rhinanthus freynii* (Sterneck) A.Kern. ex Fiori | The authorship of the name is corrected according to Art. 46 of the ICN (Turland et al. 2018) |
| **Iridaceae** | *Romulea bocchierii* Frignani & Iriti | *Romulea bocchierii* Frignani & Iiriti | Misprint in Bartolucci et al. (2018) |
| **Rosaceae** | *Rubus acheruntinus* Ten. | *Rubus acheruntinus* (Ten.) Ten. | The authorship of the name is corrected according to the protologue |
| **Rosaceae** | *Rubus austrotirolensis* (Sabr.) Dalla Torre & Sarnth. | *Rubus austrotiroliensis* (Sabr.) Dalla Torre & Sarnth. | The spelling of the specific epithet is corrected according to the protologue |
| **Asteraceae** | *Scorzonera deliciosa* Guss. ex DC. | *Scorzonera deliciosa* Guss. | The authorship of the name is corrected according to Art. 46 of the ICN (Turland et al. 2018); basionym of *Scorzonera undulata* Vahl subsp. *deliciosa* (Guss.) Maire |
| **Asteraceae** | *Scorzonera undulata* Vahl subsp. *deliciosa* (Guss. ex DC.) Maire | *Scorzonera undulata* Vahl subsp. *deliciosa* (Guss.) Maire | The authorship of the name is corrected according to Art. 46 of the ICN (Turland et al. 2018) |
| **Crassulaceae** | *Sedum nicaeense* All. | *Sedum nicaeense* auct. | Misprint in Bartolucci et al. (2018); synonym of *Petrosedum sediforme* (Jacq.) Grulich |
| **Asteraceae** | *Senecio squalidus* L. subsp. *sardous* (Fiori) Greuter | *Senecio squalidus* L. subsp. *sardous* Greuter | Misprint in Bartolucci et al. (2018), see Peruzzi et al. (2015) |
| **Caryophyllaceae** | *Silene salzmannii* Badaro | *Silene salzmannii* sensu Badarò, non Otth | Synonym of *Silene badaroi* Breistr. |
| **Brassicaceae** | *Thlaspi alliaceum* L. | *Mummenhoffia alliacea (*L.) Esmailbegi & Al-Shehbaz | Esmailbegi et al. (2018) |
| **Apocynaceae** | *Trachomitum venetum* (L.) Woodsonsubsp. *venetum* | *Poacynum venetum* (L.) Mavrodiev, Laktionov & Yu.E.Alexeev | Mavrodiev et al. (2015) |
| **Fabaceae** | *Trifolium ligusticum* Loisel. | *Trifolium ligusticum* Balb. ex Loisel. | The authorship of the name is corrected according to Art. 46 of the ICN (Turland et al. 2018) |
| **Poaceae** | *Triticum biunciale* (Vis.) K.Rich. | *Triticum biunciale* (Vis.) K.Rich. subsp. *biunciale* | At least another accepted subspecies exists |
| **Lentibulariaceae** | *Utricularia intermedia* Hayne | *Utricularia intermedia* Dreves & Hayne | Astuti and Peruzzi (2018) |
| **Plantaginaceae** | *Veronica cymbalaria* Bodard subsp. *panormitana* (Guss.) Nyman | *Veronica cymbalaria* Bodard subsp. *panormitana* (Tineo ex Guss.) Nyman | The authorship of the name is corrected according to Art. 46 of the ICN (Turland et al. 2018) |
| **Fabaceae** | *Vicia serinica* R.Uechtr. & Huter ex Porta | *Vicia serinica* R.Uechtr. & Huter | Galasso et al. (2018); the authorship of the name is corrected according to Art. 46 of the ICN (Turland et al. 2018) |

2. Distribution updates

| **Family** | **Taxon** | **Distribution update** | **References/Note** |
| --- | --- | --- | --- |
| **Ranunculaceae** | *Aconitum anthora* L. | NP TOS | Carta et al. (2018) |
| **Poaceae** | *Agrostis stolonifera* L. subsp. *maritima* (Lam.) Vasc. | P FVG | Misprint in Bartolucci et al. (2018) |
| **Rosaceae** | *Alchemilla coriacea* Buser | NP TOS | Arrigoni (2018) |
| **Rosaceae** | ET *Alchemilla polytricha* Buser | NC ITA; NC TOS, NC EMR | Arrigoni (2018) |
| **Rosaceae** | *Alchemilla radiisecta* Buser | D TOS | Arrigoni (2018) |
| **Rosaceae** | *Alchemilla strigosula* Buser | D TOS | Arrigoni (2018) |
| **Rosaceae** | *Alchemilla subsericea* Reut. | D TOS | Arrigoni (2018) |
| **Brassicaceae** | E *Alyssum rossetii* Španiel, Bovio & K.Kaplan | P VDA | Španiel et al. (2018) |
| **Poaceae** | *Anisantha rigida* (Roth) Hyl. | P FVG | Misprint in Bartolucci et al. (2018) |
| **Asteraceae** | *Artemisia maritima* L. | NP ITA; NP TOS | Carta et al. (2018) |
| **Fabaceae** | *Astragalus siculus* Biv. | NP TOS | Carta et al. (2018) |
| **Asparagaceae** | *Bellevalia webbiana* Parl. | NP LAZ | Misprint in Bartolucci et al. (2018) |
| **Asteraceae** | *Carduus nutans* L. subsp. *micropterus* (Borbás) Hayek | P FVG | Misprint in Bartolucci et al. (2018) |
| **Cyperaceae** | *Carex maritima* Gunnerus | P VEN | Lasen and Da Pozzo (2017) |
| **Cyperaceae** | *Carex microcarpa* Bertol. ex Moris | D ABR; D LAZ | Míguez et al. (2018) |
| **Cyperaceae** | *Carex paui* Sennen | P TOS | Benítez-Benítez et al. (2017), Carta et al. (2018) |
| **Cyperaceae** | *Carex vulpina* L. | P LOM | Martini et al. (2012) |
| **Plantaginaceae** | *Chaenorhinum exile* (Coss. & Kralik) Lange | P ITA; P SIC | Marcenò and Gristina (2010) |
| **Chenopodiaceae** | *Chenopodium pedunculare* Bertol. | NC EMR | Iamonico and Mosyakin (2018) |
| **Asteraceae** | *Cirsium vulgare* (Savi) Ten. subsp. *vulgare* | P FVG | Misprint in Bartolucci et al. (2018) |
| **Lamiaceae** | E *Clinopodium italicum* (Huter) Bräuchler | P ITA; P PUG | Bräuchler (2018) |
| **Rosaceae** | *Crataegus laciniata* Ucria | P A CAS TOS | Arrigoni (2018) |
| **Ranunculaceae** | *Delphinium peregrinum L.* | P ABR | Pezzetta (2011) |
| **Cyperaceae** | *Eleocharis ovata* (Roth) Roem. & Schult. | NC TOS | Arrigoni (2017) |
| **Poaceae** | *Festuca muralis* Kunth | P LOM | Martignoni et al. (2016) |
| **Rubiaceae** | *Galium verrucosum* Huds. subsp. *halophilum* (Ponzo) Lambinon | ~~E~~ | Domina and Jaouadi (2013); taxon no longer endemic to Italy |
| **Rubiaceae** | *Galium verum* L. subsp. *verum* | P FVG | Misprint in Bartolucci et al. (2018) |
| **Orchidaceae** | *Goodyera repens* (L.) R.Br. | P ABR | Steffan (2018) |
| **Asteraceae** | E *Hieracium rostanii* Nägeli & Peter subsp. *rostanii* | P ITA; P PIE | Misprint in Bartolucci et al. (2018) |
| **Asteraceae** | *Hieracium symphytaceum* Arv.-Touv. | P TOS | Carta et al. (2018) |
| **Asteraceae** | *Jacobaea aquatica* (Hill) G.Gaertn., B.Mey. & Scherb. | NP TOS | Misprint in Bartolucci et al. (2018) |
| **Asteraceae** | *Jacobaea paludosa* (L.) G.Gaertn., B.Mey. & Scherb. subsp. *paludosa* | P TAA | Misprint in Bartolucci et al. (2018) |
| **Cupressaceae** | *Juniperus sabina* L. | NP TOS | Carta et al. (2018) |
| **Fabaceae** | *Lathyrus pannonicus* (Jacq.) Garcke subsp. *pannonicus* | D ITA; D TOS | Arrigoni (2018) |
| **Asteraceae** | E *Leucanthemum glaucophyllum* (Briq. & Cavill.) Jahand. | P ITA; P LIG | Vogt et al. (2018) |
| **Asteraceae** | *Leucanthemum subglaucum* De Laramb. | NP ITA; NP LIG | Vogt et al. (2018) |
| **Plumbaginaceae** | *Limonium densiflorum* (Guss.) Kuntze | NP SAR | Erben et al. (2018) |
| **Plumbaginaceae** | *Limonium echioides* (L.) Mill. | NP TOS | Carta et al. (2018) |
| **Plumbaginaceae** | *Limonium glomeratum* (Tausch) Erben | NP SIC | Erben et al. (2018) |
| **Plumbaginaceae** | *Limonium halophilum* Pignatti | P ITA; P SIC | This species was regarded by Bartolucci et al. (2018) as synonym of *L. glomeratum* (Tausch) Erben |
| **Brassicaceae** | *Noccaea cepaeifolia* (Wulfen) Rchb. | NP TOS | Misprint in Bartolucci et al. (2018) |
| **Orchidaceae** | *Ophrys biancae* (Tod.) Macch. | NP TOS | Carta et al. (2018) |
| **Orchidaceae** | *Ophrys exaltata* Ten. subsp. *morisii* (Martelli) Del Prete | P TOS | Carta et al. (2018) |
| **Polygonaceae** | *Persicaria lapathifolia* (L.) Delarbre subsp. *pallida* (With.) Á.Löve | P LOM | Ardenghi and Polani (2016), Martignoni et al. (2016) |
| **Orobanchaceae** | *Phelipanche gussoneana* (Lojac.) Domina, Raab-Straube, Rätzel & Uhlich | P ITA; P SIC | Raab-Straube and Raus (2018) |
| **Orobanchaceae** | *Phelipanche oxyloba* (Reut.) Soják | NP ITA; NP SIC | Raab-Straube and Raus (2018) |
| **Marsileaceae** | *Pilularia minuta* Durieu ex A.Braun | P SIC | Minissale et al. (2017) |
| **Pinaceae** | *Pinus nigra* J.F.Arnold subsp. *laricio* Palib. ex Maire | P C TOS | There is no conclusive evidence available, either concerning the native or alien status of the small population growing at the eastern slopes of Monte Pisano |
| **Fagaceae** | *Quercus petraea* (Matt.) Liebl*.* subsp. *petraea* | NP SIC | Misprint in Bartolucci et al. (2018) |
| **Rosaceae** | *Rubus schleicheri* Weihe ex Tratt. | NP ITA; NP TOS | Arrigoni (2018); species belonging to *Rubus* ser. *Hystrix*, reported as exclusive of C Europe by Kuurto et al. (2010) |
| **Rosaceae** | *Rubus silesiacus* Weihe | NP TOS | Arrigoni (2018); according to Roma-Marzio et al. (2016) to refer to *R. canescens* DC. |
| **Rosaceae** | *Rubus vulgaris* Weihe & Nees | NP ITA; NP TOS | Arrigoni (2018); eported as exclusive of C Europe by Kuurto et al. (2010) |
| **Dipsacaceae** | *Scabiosa ochroleuca* L. | D PUG | Misprint in Bartolucci et al. (2018) |
| **Crassulaceae** | *Sedum litoreum* Guss. | NC TOS | Arrigoni (2018) |
| **Tamaricaceae** | *Tamarix canariensis* Willd. | D PUG | Gargano (2018) |
| **Tamaricaceae** | *Tamarix dalmatica* Baum | D PUG | Gargano (2018) |
| **Tamaricaceae** | *Tamarix gallica* L. | D PUG | Gargano (2018) |
| **Tamaricaceae** | *Tamarix hampeana* Boiss. & Heldr. | NP PUG | Gargano (2018); only cultivated |
| **Asteraceae** | *Taraxacum atrox* Kirschner & Štěpánek | P ITA; P FVG | Macháčková et al. (2018) |
| **Asteraceae** | *Taraxacum praestabile* Railonsala | P ITA; P FVG | Macháčková et al. (2018) |
| **Lamiaceae** | *Thymus vallicola* (Heinr.Braun) Ronniger | P LOM | Pignatti (2018) |
| **Poaceae** | *Triticum biunciale* (Vis.) K.Rich. subsp. *biunciale* | P BAS | Perrino et al. (2014), Pignatti (2017) |
| **Urticaceae** | *Urtica dioica* L. subsp. *pubescens* (Ledeb.) Domin | NC PIE | Misprint in Bartolucci et al. (2018) |
| **Plantaginaceae** | *Veronica barrelieri* H.Schott ex Roem. & Schult. | P LIG | Marchetti (2015) |

3. Synonyms, misapplied or included names

| **Family** | **Synonyms, misapplied or included names** | **Accepted name** | **References/Note** |
| --- | --- | --- | --- |
| **Orobanchaceae** | *Alectorolophus freynii* Sterneck | *Rhinanthus freynii* (Sterneck) A.Kern. ex Fiori |  |
| **Alismataceae** | *Alisma parnassifolium* Bassi | *Caldesia parnassifolia* (Bassi) Parl. |  |
| **Chenopodiaceae** | *Ambrina botrys* (L.) Moq. | *Dysphania botrys* (L.) Mosyakin & Clemants | Sukhorukov et al. (2018) |
| **Primulaceae** | *Androsace multiflora* (Vand.) Moretti, non Lam., *nom. illeg.* | *Androsace argentea* (C.F.Gaertn.) Lapeyr. | Dentant et al. (2018) |
| **Primulaceae** | *Androsace vandeli* Chiov. | *Androsace argentea* (C.F.Gaertn.) Lapeyr. | Dentant et al. (2018) |
| **Fabaceae** | *Anthyllis alpestris* Hegetschw. subsp. *baldensis* (Sagorski) W.Becker | *Anthyllis vulneraria* L. subsp. *baldensis* (Sagorski) Pignatti ex Kerguélen |  |
| **Fabaceae** | *Anthyllis* *baldensis* (Sagosrki) A.Kern. ex Dalla Torre & Sarnth. | *Anthyllis vulneraria* L. subsp. *baldensis* (Sagorski) Pignatti ex Kerguélen |  |
| **Fabaceae** | *Anthyllis montana* L. var. *jacquini* Rchb.f. | *Anthyllis montana* L. subsp. *jacquinii* (Rchb.f.) Rohlena | Gutermann and Kropf (2009) |
| **Fabaceae** | *Anthyllis vulneraria* L. Rasse *alpestris* (Kit.) Sagorski Unterrasse *baldensis* Sagorski | *Anthyllis vulneraria* L. subsp. *baldensis* (Sagorski) Pignatti ex Kerguélen |  |
| **Fabaceae** | *Anthyllis vulneraria* L. subsp. *baldensis* (Sagorski) Pignatti, comb. inval. | *Anthyllis vulneraria* L. subsp. *baldensis* (Sagorski) Pignatti ex Kerguélen |  |
| **Apocynaceae** | *Apocynum venetum* L. | *Poacynum venetum* (L.) Mavrodiev, Laktionov & Yu.E.Alexeev | Mavrodiev et al. (2015) |
| **Primulaceae** | *Aretia apennina* A.Huet ex Nyman | *Androsace mathildae* Levier | Dentant et al. (2018) |
| **Primulaceae** | *Aretia argentea* C.F.Gaertn. | *Androsace argentea* (C.F.Gaertn.) Lapeyr. | Dentant et al. (2018) |
| **Primulaceae** | *Aretia multiflora* Vand. | *Androsace argentea* (C.F.Gaertn.) Lapeyr. | Dentant et al. (2018) |
| **Primulaceae** | *Aretia vandeli* Turra, *nom. illeg.* | *Androsace argentea* (C.F.Gaertn.) Lapeyr. | Dentant et al. (2018) |
| **Poaceae** | *Arrhenatherum parlatorei* (J.Woods) Potztal | *Helictotrichon parlatorei* (J.Woods) Pilg. |  |
| **Chenopodiaceae** | *Atriplex arenaria* Tineo, non Nutt., *nom. illeg.* | *Atriplex tornabenei* Tineo ex Guss. subsp. *tornabenei* |  |
| **Chenopodiaceae** | *Atriplex botrys* (L.) Crantz | *Dysphania botrys* (L.) Mosyakin & Clemants | Sukhorukov et al. (2018) |
| **Chenopodiaceae** | *Botrydium botrys* (L.) Small | *Dysphania botrys* (L.) Mosyakin & Clemants | Sukhorukov et al. (2018) |
| **Poaceae** | *Brachypodium glaucovirens* (Murb.) T.Durand & B.D.Jacks., *comb. inval.* | *Brachypodium glaucovirens (*Murb.) Sagorski |  |
| **Apiaceae** | *Bupleurum obtusifolium* Ten. | *Bupleurum falcatum* L. subsp. *cernuum* (Nyman) Arcang. |  |
| **Cyperaceae** | *Carex sylvatica* Huds. subsp. *paui* (Sennen) Sennen | *Carex paui* Sennen | Troia et al. (2018) |
| **Cyperaceae** | *Carex sylvatica* Huds. var. *laxula* Tineo ex Guss. | *Carex paui* Sennen | Troia et al. (2018) |
| **Asteraceae** | ?*Centaurea integrans* Naggi | *Centaurea nigrescens* Willd. |  |
| **Asteraceae** | ?*Centaurea paniculata* L. f. *integrans* (Naggi) Fiori | *Centaurea nigrescens* Willd. |  |
| **Lamiaceae** | *Clinopodium serpyllifolium* (M.Bieb.) Kuntze subsp. *fruticosum* auct. Fl. Ital. p.p. | *Clinopodium italicum* (Huter) Bräuchler | Bräuchler (2018) |
| **Poaceae** | *Elymus asper* (Simonk.) Brand, non Nees ex Steud. | *Taeniatherum asperum* (Simonk.) Nevski |  |
| **Pteridaceae** | *Hemionitis acrostica* (Balb.) Mosyakin | *Oeosporangium acrosticum* (Balb.) L.Sáez & Aymerich | Mosyakin (2018) |
| **Pteridaceae** | *Hemionitis atreyu* Christenh., *nom. inval.* | *Oeosporangium acrosticum* (Balb.) L.Sáez & Aymerich | Mosyakin (2018) |
| **Caryophyllaceae** | *Herniaria nebrodensis* (Nyman) Jan ex Strobl, *nom. illeg.* | *Herniaria glabra* L. subsp. *nebrodensis* Nyman |  |
| **Asteraceae** | *Hieracium stenoplecum* auct. | *Hieracium entleutneri* Zahn ex Gottschl. | Gottschlich (2017) |
| **Lamiaceae** | *Lamium garganicum* L. subsp. *laevigatum* (L.) Arcang. | *Lamium maculatum* L. |  |
| **Lamiaceae** | *Lamium garganicum* L. subsp. *laevigatum* auct., non (L.) Arcang. | *Lamium garganicum* L. subsp. *longiflorum* (Ten.) Kerguélen |  |
| **Lamiaceae** | *Lamium garganicum* L. var. *laevigatum* (L.) Ces., Pass. & Gibelli | *Lamium maculatum* L. |  |
| **Lamiaceae** | *Lamium garganicum* L. var. *laevigatum* auct., non (L.) Ces., Pass. & Gibelli | *Lamium garganicum* L. subsp. *longiflorum* (Ten.) Kerguélen |  |
| **Lamiaceae** | *Lamium garganicum* L. var. *longiflorum* (Ten.) Halácsy | *Lamium garganicum* L. subsp. *longiflorum* (Ten.) Kerguélen |  |
| **Lamiaceae** | *Lamium longiflorum* Ten. | *Lamium garganicum* L. subsp. *longiflorum* (Ten.) Kerguélen |  |
| **Asteraceae** | *Leucanthemum subglaucum* auct. Fl. Ital. | *Leucanthemum glaucophyllum* (Briq. & Cavill.) Jahand. | Vogt et al. (2018) |
| **Fabaceae** | *Medicago cancellata* Ten., *nom. illeg.* | *Medicago tenoreana* Ser. |  |
| **Lamiaceae** | *Micromeria fruticosa* (L.) Druce *var. italica* (Huter) Fenaroli | *Clinopodium italicum* (Huter) Bräuchler | Bräuchler (2018) |
| **Lamiaceae** | *Micromeria marifolia* (Cav) Benth.var. *italica* Huter | *Clinopodium italicum* (Huter) Bräuchler | Bräuchler (2018) |
| **Chenopodiaceae** | *Neobotrydium botrys* (L.) Moldenke | *Dysphania botrys* (L.) Mosyakin & Clemants | Sukhorukov et al. (2018) |
| **Orobanchaceae** | *Phelipanche oxyloba* auct. Fl. Ital. | *Phelipanche gussoneana* (Lojac.) Domina, Raab-Straube, Rätzel & Uhlich | Raab-Straube and Raus (2018) |
| **Rosaceae** | *Potentilla recta* L. subsp. *levieri* Arrigoni | *Potentilla recta* L. |  |
| **Primulaceae** | *Primula cynoglossifolia* (Widmer) Landolt | *Primula latifolia* Lapeyr. subsp. *graveolens* (Hegetschw.) Rouy |  |
| **Primulaceae** | *Primula graveolens* Hegetschw. | *Primula latifolia* Lapeyr. subsp. *graveolens* (Hegetschw.) Rouy |  |
| **Primulaceae** | *Primula latifolia* Lapeyr. var. *cynoglossifolia* Widmer | *Primula latifolia* Lapeyr. subsp. *graveolens* (Hegetschw.) Rouy |  |
| **Primulaceae** | *Primula latifolia* Lapeyr. subsp. *cynoglossifolia* (Widmer) L.B.Zhang | *Primula latifolia* Lapeyr. subsp. *graveolens* (Hegetschw.) Rouy |  |
| **Orobanchaceae** | *Rhinanthus alectorolophus* (Scop.) Pollich subsp. *freynii* (Sterneck) Hartl | *Rhinanthus freynii* (Sterneck) A.Kern. ex Fiori |  |
| **Orobanchaceae** | *Rhinanthus alectorolophus* (Scop.) Pollich var. *freynii* (Sterneck) Chabert | *Rhinanthus freynii* (Sterneck) A.Kern. ex Fiori |  |
| **Chenopodiaceae** | *Roubieva botrys* (L.) Fuss | *Dysphania botrys* (L.) Mosyakin & Clemants | Sukhorukov et al. (2018) |
| **Rosaceae** | *Rubus agrestis* Waldst. & Kit. var. *acheruntinus* Ten. | *Rubus acheruntinus* (Ten.) Ten. |  |
| **Rosaceae** | *Rubus corylifolius* Sm. | *Rubus* sect. *Corylifolii* Lindl. |  |
| **Asteraceae** | *Senecio orientalis* sensu Ten., non Willd. | *Senecio doronicum* (L.) L. subsp. *orientalis* J.Calvo |  |
| **Solanaceae** | *Solanum nigrum* L. var. *perennans* Bertol. | *Solanum nigrum* L. | Särkinen et al. (2018) |
| **Solanaceae** | *Solanum nigrum* L. var. *schultesii* (Opiz) Rouy | *Solanum nigrum* L. | Särkinen et al. (2018) |
| **Solanaceae** | *Solanum schultesii Opiz* | *Solanum nigrum* L. | Särkinen et al. (2018) |
| **Chenopodiaceae** | *Teloxys botrys* (L.) W.A.Weber | *Dysphania botrys* (L.) Mosyakin & Clemants | Sukhorukov et al. (2018) |
| **Brassicaceae** | *Turritis stricta* All. | *Arabis allionii* DC. |  |
| **Chenopodiaceae** | *Vulvaria botrys* (L.) Bubani | *Dysphania botrys* (L.) Mosyakin & Clemants | Sukhorukov et al. (2018) |
